# Supplementary figures and images for: Dynamic evolution of a vesicle formed by comb-like block copolymer-tethered nanoparticles: a dissipative particle dynamics simulation study
Source: Royal Society of Chemistry journal article supplement (doi:10.1039/c7cp05196d), 2017-01-01

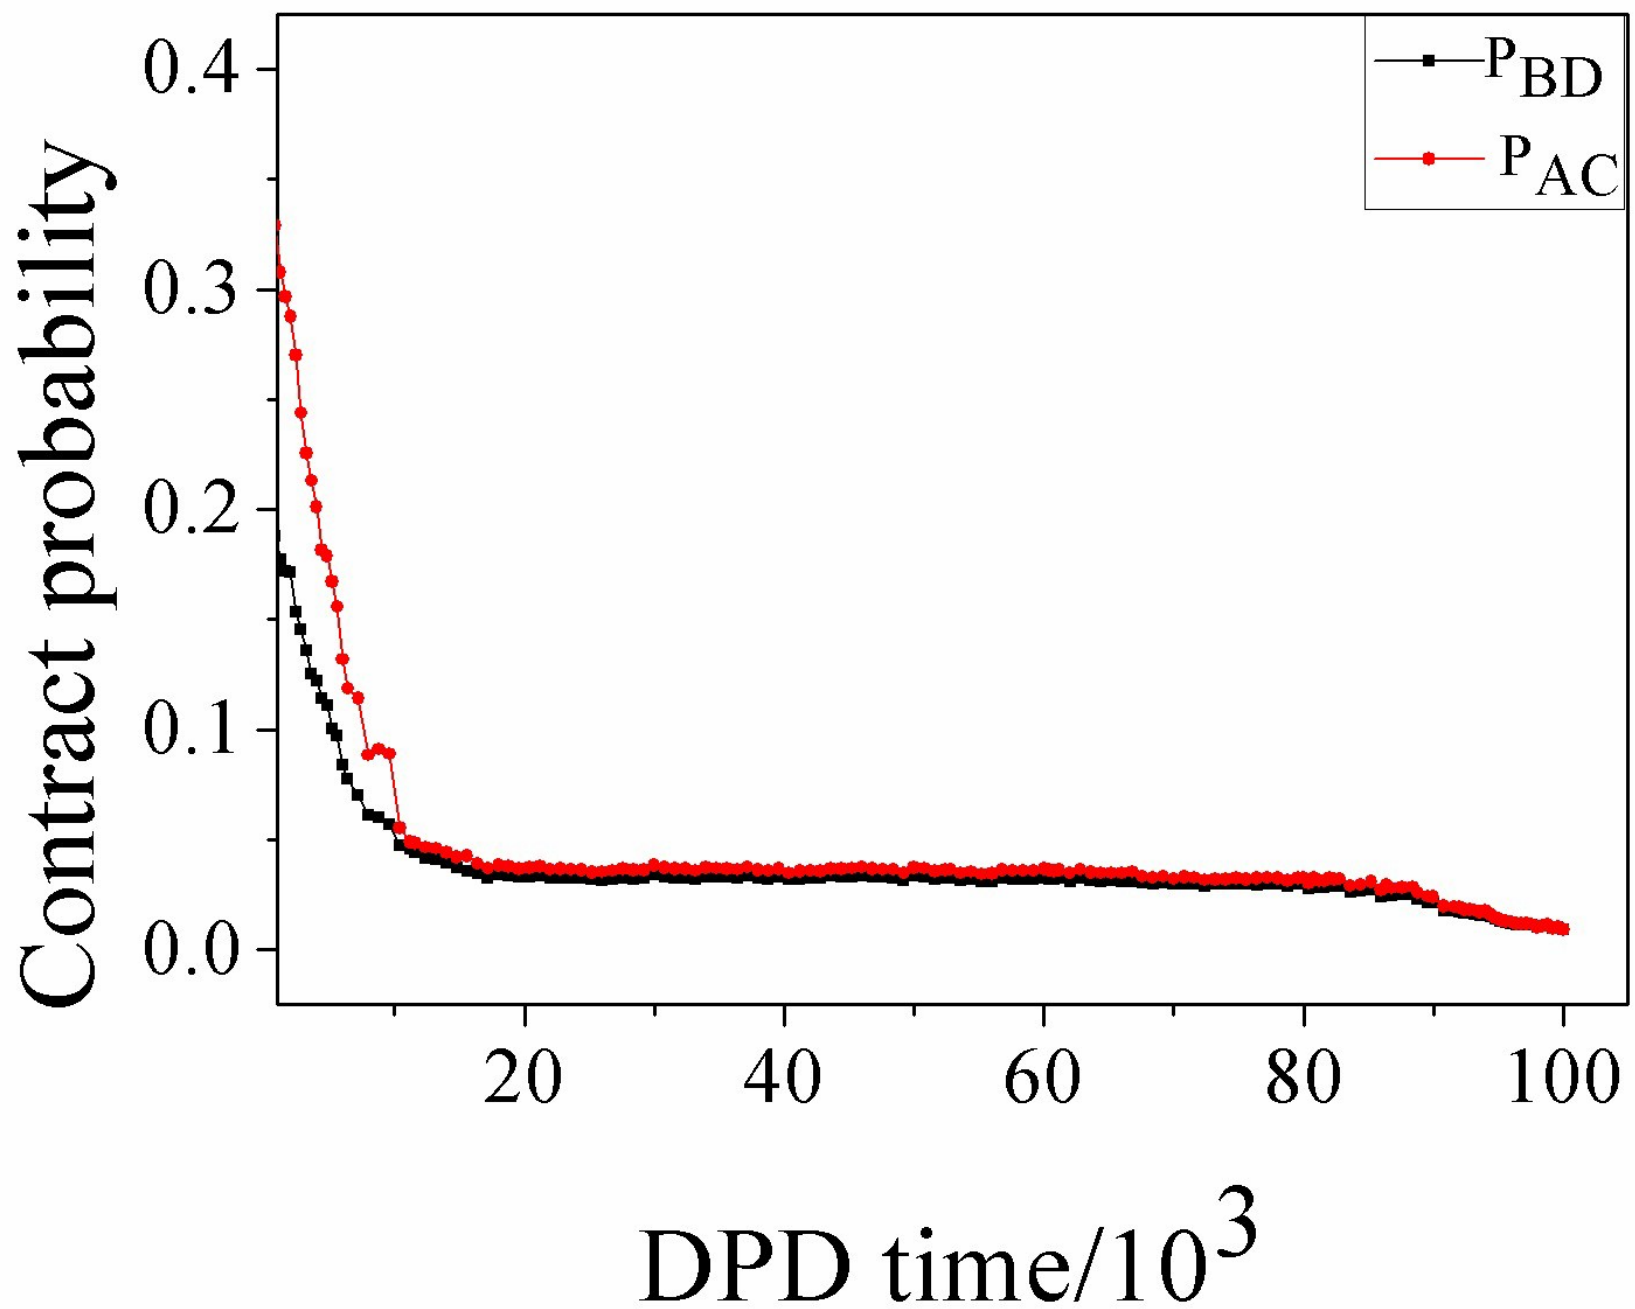

Supplement: c7cp05196d3.pdf [file c7cp05196d3.pdf]
